# Supplementary material for: Rad51C-ATXN7 fusion gene expression in colorectal tumors
Source: PubMed Central journal article supplement (PMC4906819; doi:10.1186/s12943-016-0527-1), 2016-06-13
Supplement: 12943_2016_527_MOESM4_ESM.pdf [file 12943_2016_527_MOESM4_ESM.pdf]

**Supplementary figure 1**

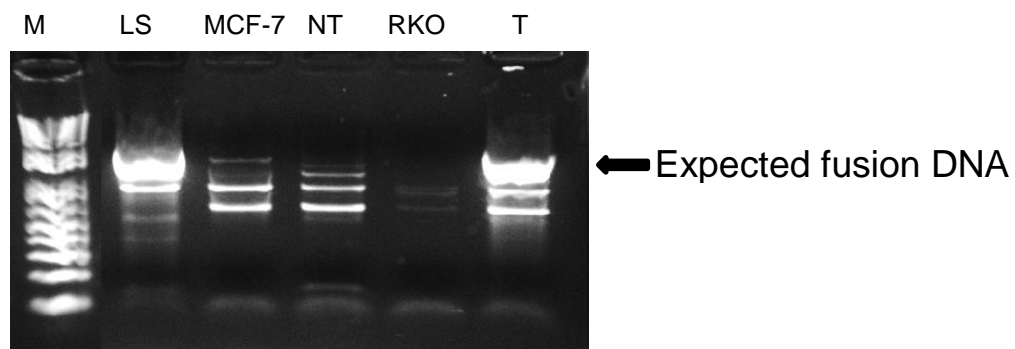

**Fig. S1. PCR amplification of Rad51C-ATXN7 fusion DNA:** Genomic DNA was isolated from the LS 174T, MCF-7, RKO, tumors (T) and non-tumors (NT). PCR was performed using forward primer (sequence 5'-GCCCTGGGTTTTAAGGT TTT-3') located in the intron 5 of Rad51C and reverse primer (5'ATGCATTGGCCTGGTGTT-3') located in exon-6 of ATXN7. The expected PCR product was amplified mainly in the LS-174T cell, human colorectal tumor (T).
